# Supplementary material
Source: publisher site journal article supplement (https://www.dovepress.com/article/436926)
Supplement: Supplementary file 1 [file get_supplementary_file.php]

**Figure S1: FIH-1 protein levels in HBV-related HCC patients and HepG2.**

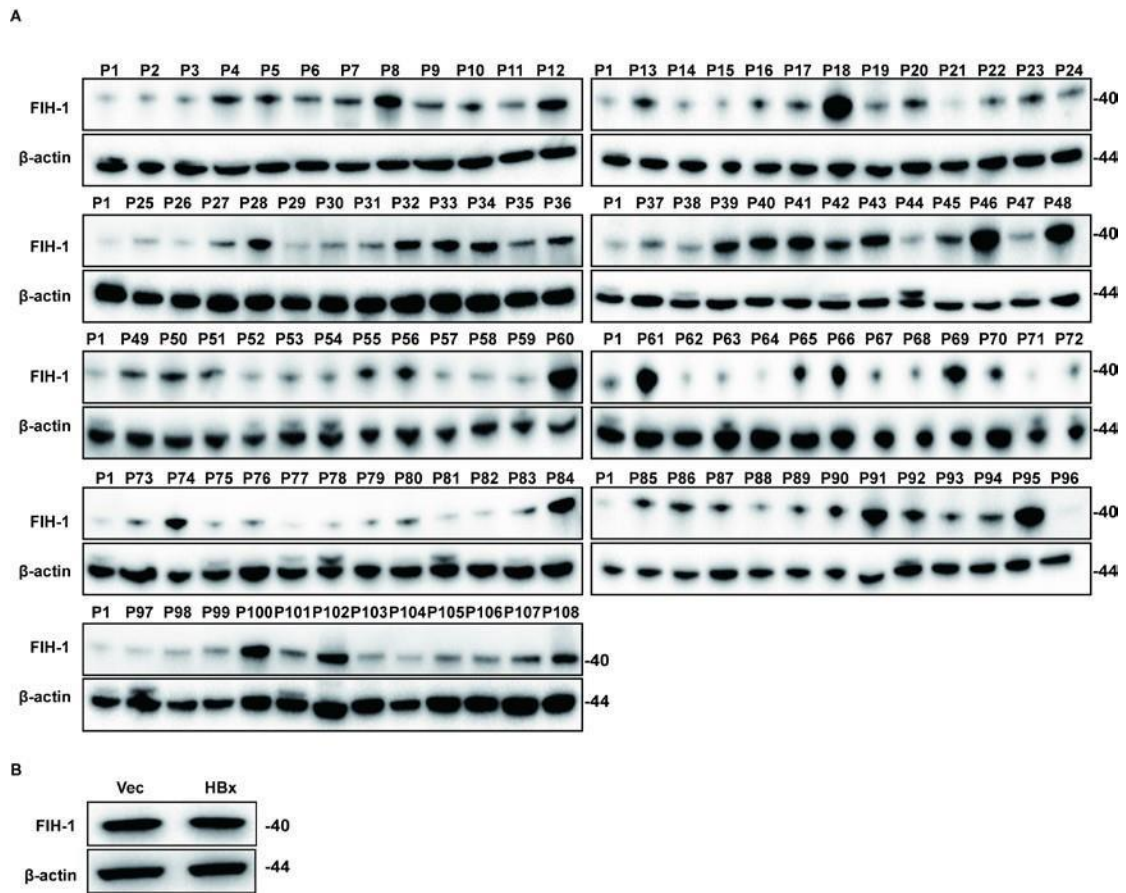

(A) Western blot analysis of FIH-1 expression in 108 patient samples. (B) Western blot analysis of FIH-1 expression in HepG2 cells. Cells were transfected with pcDNA3.1(+)-CMV-HBX-flag-P2A-EGFP or vector.

**Figure S2: HBV-miR-3 does not have effect on PHDs.**

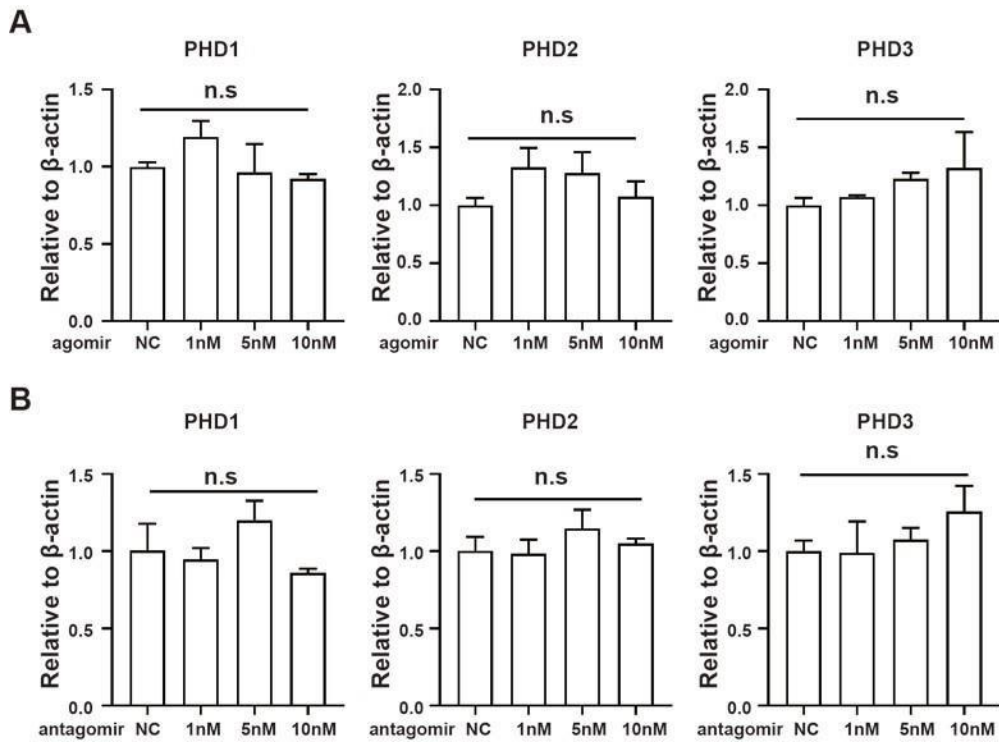

(A) qPCR analysis of PHD1, PHD2 and PHD3 expression in HepG2 cells transfected with different concentrations of HBV-miR-3 agomir. (B) qPCR analysis of PHD1, PHD2 and PHD3 expression in HepG2.2.15 cells transfected with different concentrations of HBV-miR-3 agomir.

**Figure S3: HBV-miR-3 does not have direct angiogenic effect on HUEVCs.**

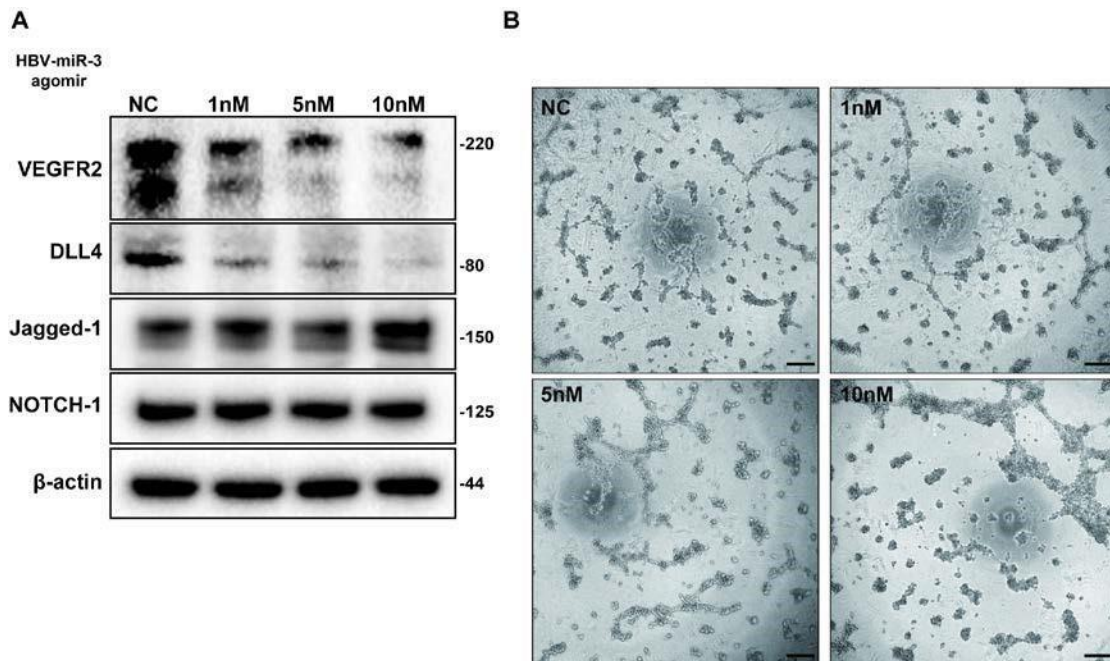

(A) Western blot analysis of VEGFR2, DLL4, Jagged-1, and NOTCH-1 expression in HUVECs transfected with different concentrations of HBV-miR-3 agomir. (B)

Representative pictures of lumen formation assay. Scale bar=200  $\mu$ m

**Figure S4: HBV-miR-3 antagomir does not have effect on non-HBV-related HCC.**

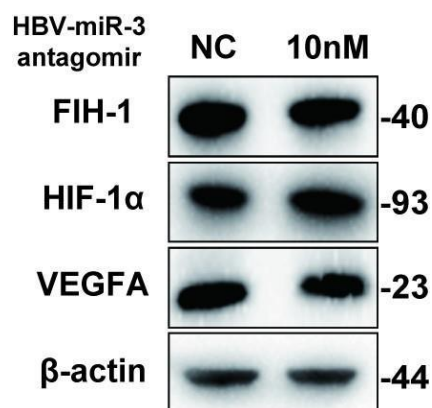

Western blot analysis of FIH-1, HIF-1 $\alpha$ , and VEGFA expression in Huh7 cells transfected with 10nM antagomir NC and HBV-miR-3 agomir.

Table S1. Primers Used for RT-qPCR and HBV-miR-3 regulation

| Primer Name            | Sequence (5'-3')                                  |
|------------------------|---------------------------------------------------|
| HBV-miR-3 RT           | GTCGTATCCAGTGCAGGGTCCGAGGTGCACTGGATACGACAGAAGAAC  |
| HBV-miR-3 Forward      | TGCGGATCTTCTTGTGGTT                               |
| U6 RT                  | GTCGTATCCAGTGCAGGGTCCGAGGTGCACTGGATACGACAAAATATGG |
| U6 Forward             | CTCGCTTCGGCAGCACA                                 |
| miRNA Reverse prim     | AACGCTTCACGAATTTGCGT                              |
| HBV-miR-3 agomir       | CUGGAUGUGUCUGCGGCGUUU                             |
| HBV-miR-3 agomir_Mut   | CCUCCUCGUCUGCGGCGUUU                              |
| HBV-miR-3 agomir NC    | UUCUCCGAACGUGUCACGUUU                             |
| HBV-miR-3 antagomir    | AAACGCCGCAGACACAUCCAG                             |
| HBV-miR-3 antagomir NC | CAGUACUUUUGUGUAGUACAA                             |
| $\beta$ -actin Forward | GATTACTGCCCTTGCTCCTA                              |
| $\beta$ -actin Reverse | TCATCGTACTCCTGCTTGCT                              |
| VEGFA Forward          | TTGCCTTGCTGCTCTACCTCCA                            |
| VEGFA Reverse          | GATGGCAGTAGCTGCGCTGATA                            |
| VEGFR2 Forward         | GTGACCAACATGGAGTCGTG                              |
| VEGFR2 Reverse         | CCAGAGATTCCATGCCACTT                              |
| FIH-1 Forward          | TCATTGGCATGGAAGGAAATGTG                           |
| FIH-1 Reverse          | GGTAGAGGCACTCGAACTGA                              |
| HIF-1 $\alpha$ Forward | TATGAGCCAGAAGAACTTTTAGGC                          |
| HIF-1 $\alpha$ Reverse | CACCTCTTTTGGCAAGCATCCTG                           |

Table S2. Relative Expression of HBV-miR-3, VEGFR2 and FIH-1 of Patients

| Patient | HBV-miR-3 | VEGFR2 | FIH-1  | Patient | HBV-miR-3 | VEGFR2 | FIH-1  | Patient | HBV-miR-3 | VEGFR2 | FIH-1  |
|---------|-----------|--------|--------|---------|-----------|--------|--------|---------|-----------|--------|--------|
| P1      | 1.000     | 1.000  | 1.000  | P37     | 0.000     | 0.289  | 1.604  | 3-72    | 0.000     | 0.156  | 1.213  |
| P2      | 0.470     | 0.841  | 1.631  | P38     | 0.863     | 1.028  | 1.553  | 3-99    | 0.000     | 0.130  | 4.356  |
| P3      | 0.000     | 0.000  | 1.963  | P39     | 1.158     | 0.559  | 4.622  | 3-100   | 1.286     | 0.616  | 1.006  |
| P4      | 0.278     | 0.363  | 8.625  | P40     | 0.801     | 0.200  | 5.932  | 3-69    | 0.000     | 0.275  | 1.091  |
| P5      | 0.000     | 0.052  | 6.551  | P41     | 1.000     | 0.034  | 6.383  | 3-86    | 0.000     | 0.633  | 0.546  |
| P6      | 0.129     | 0.042  | 4.729  | P42     | 0.984     | 0.555  | 3.656  | 3-5     | 0.000     | 0.747  | 1.026  |
| P7      | 0.316     | 0.139  | 5.826  | P43     | 0.000     | 0.000  | 5.287  | 3-1     | 0.000     | 0.121  | 0.855  |
| P8      | 0.000     | 0.000  | 13.979 | P44     | 1.192     | 0.895  | 1.075  | 3-24    | 0.000     | 0.395  | 1.521  |
| P9      | 0.000     | 0.195  | 4.829  | P45     | 1.049     | 0.172  | 4.182  | 3-89    | 0.000     | 0.563  | 0.715  |
| P10     | 1.930     | 0.616  | 4.111  | P46     | 0.000     | 0.035  | 17.334 | 4-34    | 0.000     | 0.361  | 0.726  |
| P11     | 2.265     | 0.325  | 3.621  | P47     | 0.686     | 0.566  | 1.908  | 4-15    | 0.000     | 0.398  | 1.473  |
| P12     | 0.000     | 0.048  | 9.298  | P48     | 0.000     | 0.091  | 10.029 | 4-24    | 0.000     | 0.448  | 3.657  |
| P13     | 0.000     | 0.238  | 3.588  | P49     | 1.076     | 0.112  | 3.033  | 4-31    | 0.001     | 0.287  | 4.491  |
| P14     | 1.294     | 0.196  | 1.037  | P50     | 0.000     | 0.678  | 4.624  | 4-78    | 0.001     | 0.514  | 5.513  |
| P15     | 1.386     | 0.620  | 1.110  | P51     | 0.036     | 0.503  | 3.707  | 4-99    | 0.001     | 0.206  | 2.741  |
| P16     | 0.000     | 0.139  | 2.516  | P52     | 0.000     | 0.000  | 1.488  | 4-18    | 0.001     | 0.212  | 1.686  |
| P17     | 0.000     | 0.210  | 2.831  | P53     | 0.048     | 0.293  | 1.789  | 4-59    | 0.000     | 0.079  | 2.864  |
| P18     | 0.000     | 0.033  | 15.625 | P54     | 0.000     | 0.000  | 1.526  | 4-73    | 0.001     | 0.134  | 5.048  |
| P19     | 1.543     | 0.287  | 2.060  | P55     | 0.045     | 0.097  | 5.478  | 5-97    | 0.000     | 0.000  | 9.496  |
| P20     | 0.000     | 0.095  | 2.572  | P56     | 0.077     | 0.068  | 5.168  | 5-98    | 0.001     | 0.651  | 2.914  |
| P21     | 0.000     | 0.049  | 0.496  | P57     | 0.066     | 0.000  | 2.048  | 5-41    | 0.000     | 0.933  | 2.011  |
| P22     | 1.106     | 0.476  | 1.680  | P58     | 0.000     | 1.079  | 1.747  | 5-47    | 0.007     | 0.382  | 2.983  |
| P23     | 0.000     | 0.245  | 2.448  | P59     | 0.045     | 0.401  | 2.001  | 5-86    | 0.000     | 0.308  | 11.795 |
| P24     | 1.597     | 1.157  | 1.734  | P60     | 0.000     | 0.199  | 16.398 | 5-9     | 0.003     | 0.390  | 0.237  |
| P25     | 1.682     | 0.344  | 2.301  | P61     | 0.000     | 0.189  | 2.678  | 5-67    | 0.002     | 0.013  | 1.279  |
| P26     | 1.456     | 1.021  | 1.378  | P62     | 0.000     | 0.008  | 0.308  | 5-30    | 0.005     | 0.042  | 3.792  |
| P27     | 1.164     | 0.235  | 1.456  | P63     | 0.000     | 0.171  | 0.399  | 5-77    | 0.002     | 0.042  | 3.610  |
| P28     | 1.423     | 0.460  | 2.263  | P64     | 2.830     | 0.319  | 0.174  | 5-16    | 0.003     | 0.002  | 7.646  |
| P29     | 2.015     | 0.566  | 1.685  | P65     | 0.830     | 0.140  | 1.146  | 6-1     | 0.000     | 0.009  | 2.514  |
| P30     | 1.275     | 0.361  | 1.775  | P66     | 0.000     | 0.387  | 1.677  | 6-25    | 0.000     | 0.025  | 4.856  |
| P31     | 1.570     | 0.418  | 1.398  | P67     | 1.300     | 0.390  | 0.920  | 6-17    | 0.000     | 0.004  | 2.682  |
| P32     | 1.556     | 0.068  | 1.513  | P68     | 0.000     | 0.049  | 0.947  | 6-68    | 0.001     | 0.028  | 1.675  |

|     |       |       |       |     |       |       |       |      |       |       |       |
|-----|-------|-------|-------|-----|-------|-------|-------|------|-------|-------|-------|
| P33 | 1.354 | 0.207 | 1.763 | P69 | 2.260 | 0.057 | 3.066 | 6-44 | 0.006 | 0.003 | 3.065 |
| P34 | 1.431 | 0.067 | 1.616 | P70 | 0.000 | 0.173 | 1.022 | 6-95 | 0.000 | 0.013 | 2.972 |
| P35 | 1.304 | 0.146 | 1.647 | P71 | 2.310 | 0.243 | 0.318 | 6-59 | 0.000 | 0.014 | 2.310 |
| P36 | 1.234 | 0.043 | 1.884 | P72 | 1.660 | 0.285 | 1.186 | 6-11 | 0.000 | 0.004 | 3.495 |
